# Supplementary material for: Association of circulating exosomal miR-122 levels with BAT activity in healthy humans
Source: PubMed Central journal article supplement (PMC6744505; doi:10.1038/s41598-019-49754-1), 2019-09-13

# Association of circulating exosomal miR-122 levels with BAT activity in healthy humans

Yuko Okamatsu-Ogura<sup>1\*</sup>, Mami Matsushita<sup>2</sup>, Jussiaea Valente Bariuan<sup>1</sup>, Kazuki Nagaya<sup>1</sup>, Ayumi Tsubota<sup>1</sup> and Masayuki Saito<sup>1</sup>

<sup>1</sup> Laboratory of Biochemistry, Faculty of Veterinary Medicine, Hokkaido University, Sapporo 060-0818, Japan

<sup>2</sup> Department of Nutrition, School of Nursing and Nutrition, Tenshi College, Sapporo 065-0013, Japan

## Supplementary Figure S1

List of miRNAs which showed more than 1.5-fold difference between the low and high BAT groups

Low BAT > High BAT

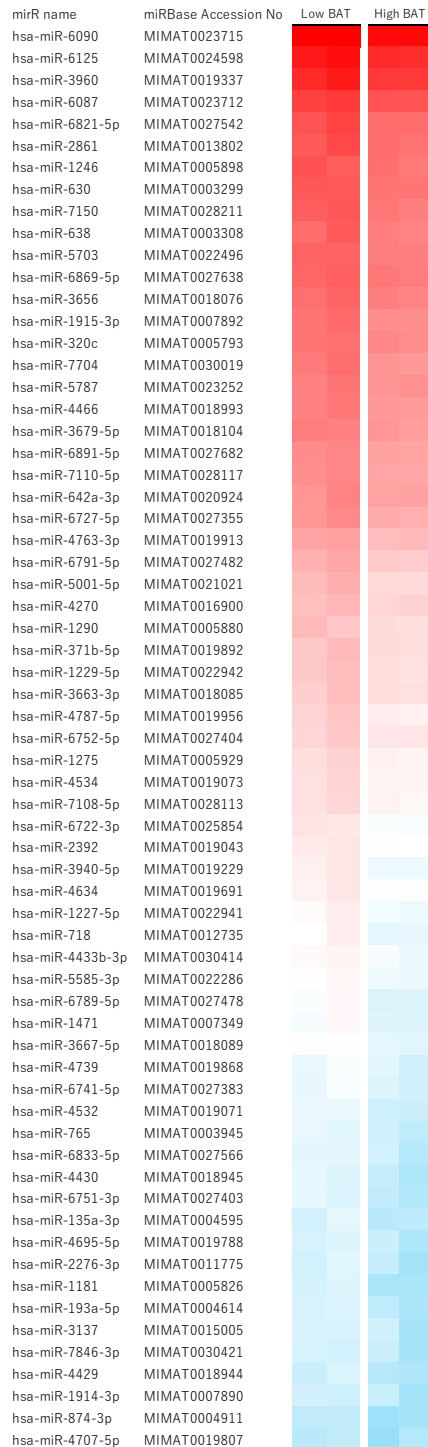

Low BAT < High BAT

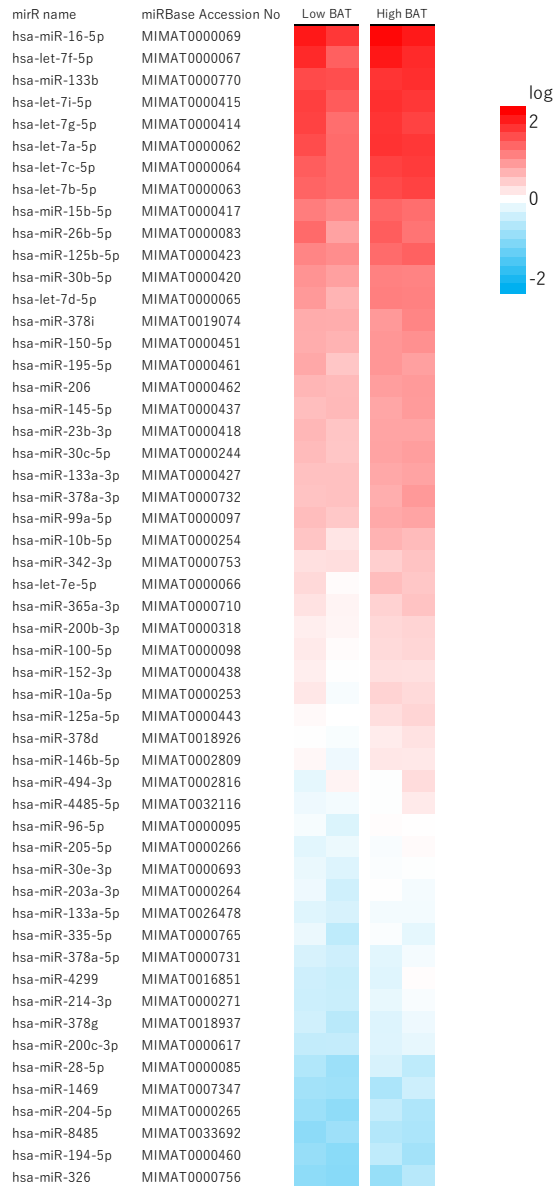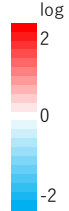

Supplement: 41598_2019_49754_MOESM1_ESM.pdf [file 41598_2019_49754_MOESM1_ESM.pdf]
